# Supplementary material for: Excipient-Free Inhalable Microparticles of Azithromycin Produced by Electrospray: A Novel Approach to Direct Pulmonary Delivery of Antibiotics
Source: Pharmaceutics. 2021 Nov 23;13(12):1988. doi: 10.3390/pharmaceutics13121988 (PMC8704604; doi:10.3390/pharmaceutics13121988)
Supplement: Supplementary file 1 [file pharmaceutics-13-01988-s001.zip › pharmaceutics-1450162-supplementary.pdf]

# Supplementary Materials: Excipient-Free Inhalable Microparticles of Azithromycin Produced by Electrospray: A Novel Approach to Direct Pulmonary Delivery of Antibiotics

Beatriz Arauzo, Tania B. Lopez-Mendez, Maria Pilar Lobera, Javier Calzada-Funes, Jose Luis Pedraz and Jesus Santamaria

**Table S1.** Determination of the inhaler Breezhaler® resistance. The resistance was calculated by measurement of the flow rate for different values of the pressure drop (1, 2, 3 and 4 KPa) through the equipment. The resistance value was calculated as the slope of the linear fit of the square root of pressure drop versus flow rate\*.

| Pressure Drop (KPa) | $\sqrt{\text{Pressure Drop}}$ | Flow (L/min)                                   |
|---------------------|-------------------------------|------------------------------------------------|
| 4                   | 2                             | 104                                            |
| 3                   | 1.73                          | 91                                             |
| 2                   | 1.41                          | 74.5                                           |
| 1                   | 1                             | 54.5                                           |
| Device Resistance   |                               | 0.0202 KPa <sup>0.5</sup> /L <sup>-1</sup> min |

\*  $y = 0.0202x - 0.101$  ( $R^2 = 0.9997$ ).

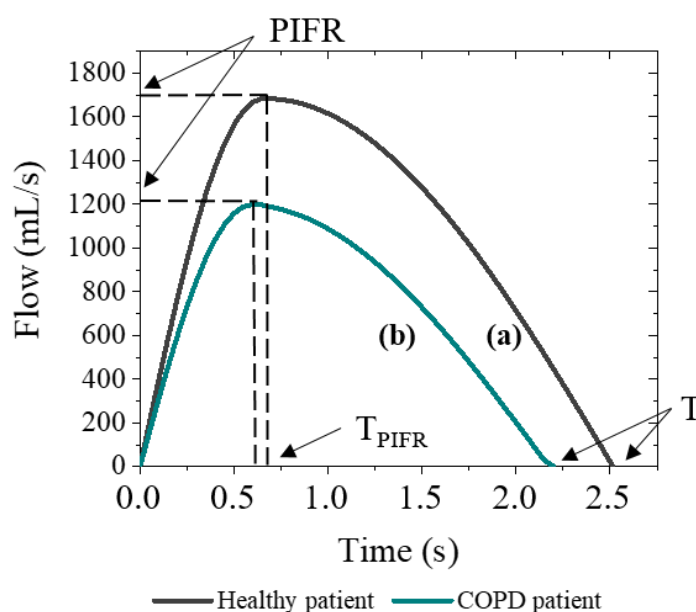

**Figure S1.** Breathing profiles tested throughout the study. (a) Simulated respiratory profile of a healthy patient (total time: 2.51 s); (b) Simulated respiratory profile of a COPD patient (total time: 2.21 s).

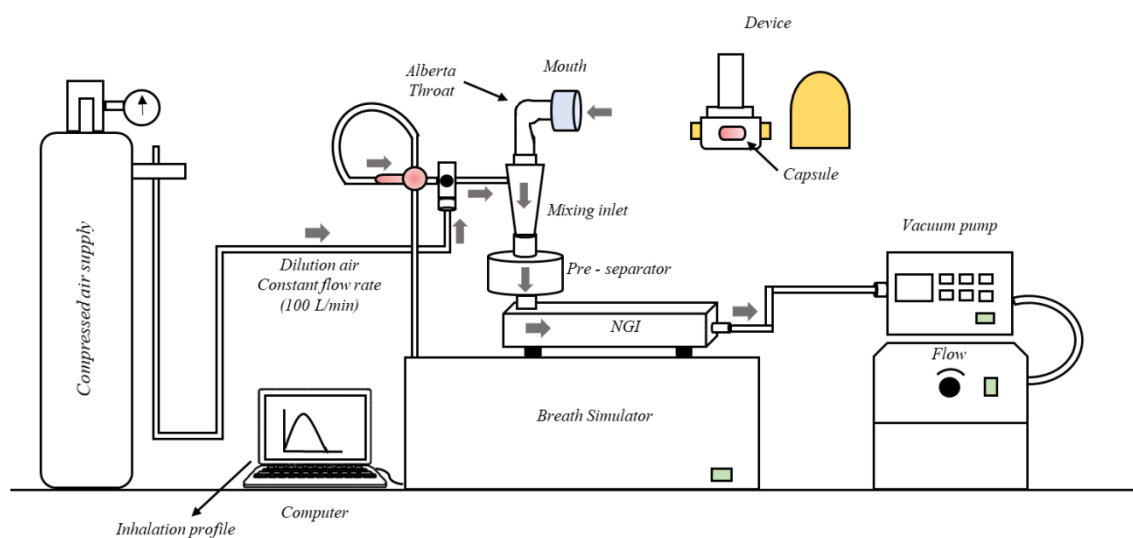

**Figure S2.** Experimental device for measurements with pre-determined breathing profiles. The set up consists of Alberta throat model™, mixing inlet™, breath simulator™ and Next generation impactor (NGI)™.

**Table S2.** Parameters and equations employed to obtain the breathing profiles

| Parameters*        | Healthy Profile                                                            | COPD profile |
|--------------------|----------------------------------------------------------------------------|--------------|
| PIFR               | 101.1 L/min                                                                | 72 L/min     |
| TPIFR              | 0.66 s                                                                     | 0.60 s       |
| V                  | $T(s) = \frac{PIFR \times [L \times \min^{-1}] \times T(s)}{30 \pi}$       |              |
|                    | 2.7 L                                                                      | 1.7 L        |
| T <sub>total</sub> | $T(s) = \frac{30 \pi \times V(L)}{PIFR \times (L \times \min - 1)}$        |              |
|                    | 2.517 s                                                                    | 2.225 s      |
| Function           | $0 \leq t < TPIFR$                                                         |              |
|                    | $FR(t) = PIFR \times \sin\left(\frac{\pi t}{2TPIFR}\right)$                |              |
|                    | $TPIFR \leq t \leq T$                                                      |              |
|                    | $FR(t) = PIFR \times \cos\left(\frac{\pi(t - TPIFR)}{2(T - TPIFR)}\right)$ |              |

\*PIFR: Peak inspiratory flow rate; TPIFR: the time at which PIFR occurs; V: inhaled volume; T: Inspiration total time.

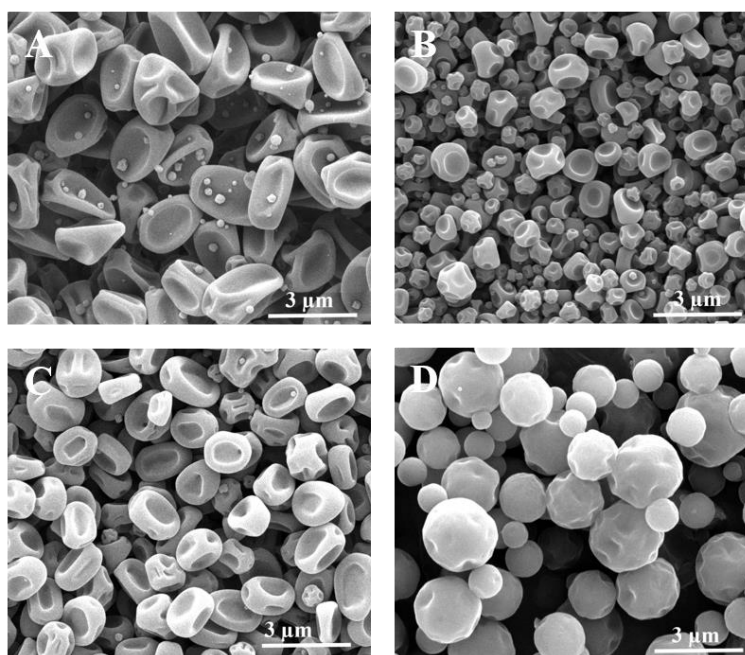

**Figure S3.** SEM images of particles generated for different solvents (AZT 10% *w/w*) the flow used was 1.5 mL/h. (A) ethanol; (B) ethanol/acetone (1/1); (C) acetone; (D) chloroform.

**Table S3.** Solvent selection. Experimental parameters used (solvent, flow rate, AZT concentration) and resulting particle sizes.

| 10% <i>w/w</i> Azithromycin |             |             |
|-----------------------------|-------------|-------------|
| Solvent                     | Flow (mL/h) | Size (μm)   |
| Chloroform                  | 1           | 2.06 ± 0.75 |
|                             | 1.5         | 3.10 ± 0.60 |
|                             | 2           | 3.55 ± 0.90 |
|                             | 2.5         | 4.75 ± 0.75 |
| Ethanol                     | 1           | 1.40 ± 0.37 |
|                             | 1.5         | 2.30 ± 0.40 |
|                             | 2           | 1.80 ± 0.33 |
|                             | 2.5         | 2.00 ± 0.35 |
| Acetone                     | 1           | 1.10 ± 0.20 |
|                             | 1.5         | 1.15 ± 0.30 |
|                             | 2           | 1.65 ± 0.25 |
|                             | 2.5         | 0.90 ± 0.28 |
| Ethanol/Acetone (1/1)       | 1           | 0.86 ± 0.26 |
|                             | 1.5         | 0.87 ± 0.27 |
|                             | 2           | 0.85 ± 0.22 |
|                             | 2.5         | 0.75 ± 0.30 |

**Table S4.** Optimization of AZT concentration for electrospraying in chloroform. Experimental parameters used (concentration, flow rate) and resulting particle sizes.

| Chloroform            |             |                        |
|-----------------------|-------------|------------------------|
| Concentration (% w/w) | Flow (mL/h) | Size ( $\mu\text{m}$ ) |
| 1                     | 1           | $1.07 \pm 0.50$        |
|                       | 1.5         | $1.10 \pm 0.50$        |
|                       | 2           | $2.50 \pm 0.52$        |
| 2.5                   | 1           | $1.80 \pm 0.72$        |
|                       | 1.5         | $2.10 \pm 0.70$        |
|                       | 2           | $2.75 \pm 1.03$        |
| 5                     | 1           | $1.70 \pm 0.40$        |
|                       | 1.5         | $2.90 \pm 0.85$        |
|                       | 2           | $2.40 \pm 0.60$        |
| 10                    | 1           | $2.06 \pm 0.75$        |
|                       | 1.5         | $3.10 \pm 0.60$        |
|                       | 2           | $3.55 \pm 0.90$        |

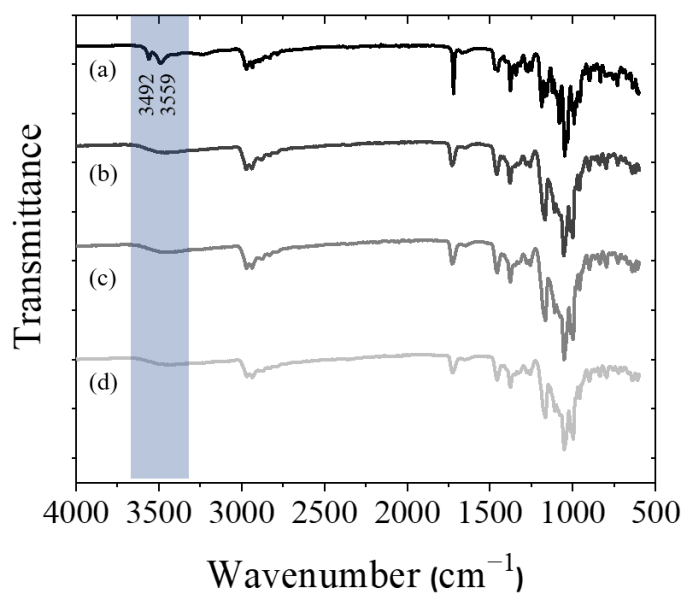**Figure S4.** FTIR spectra of: (a) Raw azithromycin; (b) AZT MPs ethanol; (c) AZT MPs acetone; (d) AZT MPs chloroform.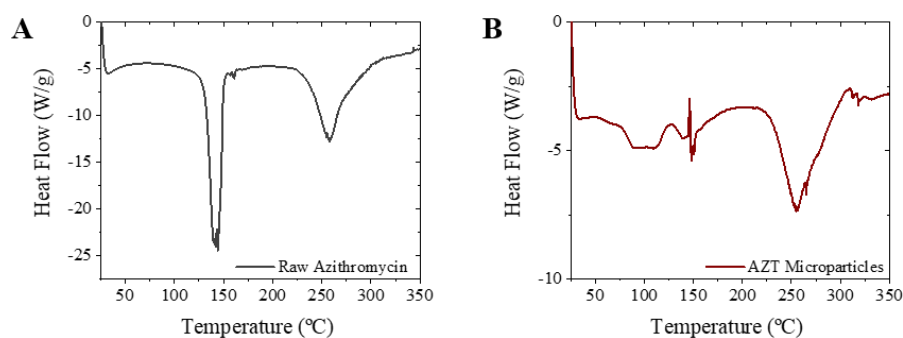**Figure S5.** Differential Scanning Calorimetric: (A) raw Azithromycin; (B) electrosprayed microparticles.

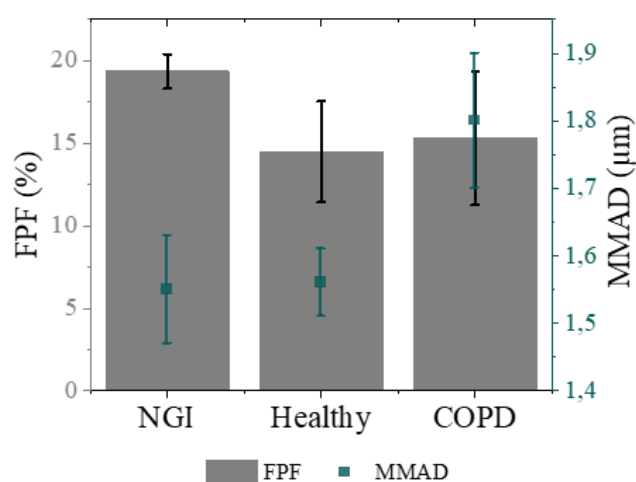

**Figure S6.** Characterization of aerosols formed by electrosprayed azithromycin microparticles. Data are shown by FPF and MMAD,  $n=3$ , Mean  $\pm$  SD.

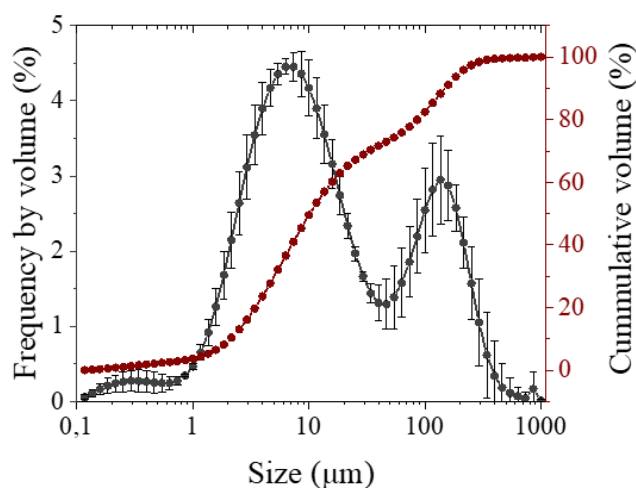

**Figure S7.** Particle size distribution of azithromycin particles as dry powder. Measurement was determined using a Spraytec at an airflow of 100 L/min ( $n=3$ , data are represented as mean  $\pm$  S.D.).

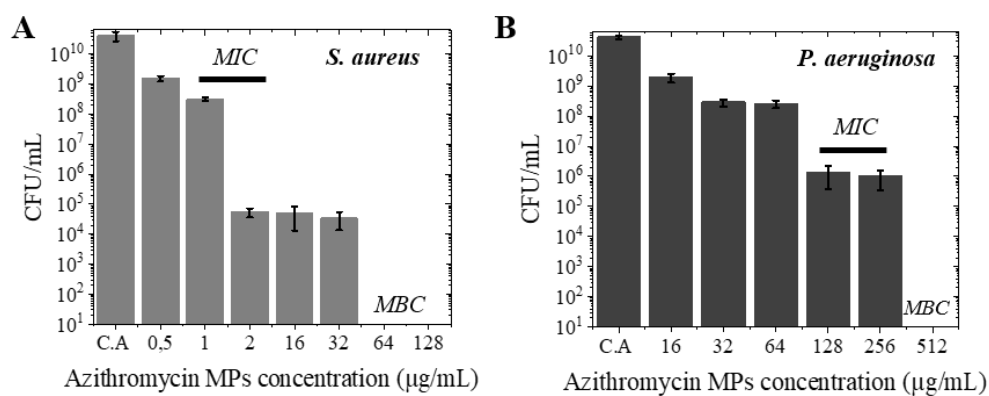

**Figure S8.** Antibacterial activity (CFU/mL) of AZT microparticles. (A) *S. aureus*; (B) *P. aeruginosa*,  $n=3$ , Mean  $\pm$  SD.
